# Supplementary material for: Enzymatic Synthesis of a Novel Coumarin Aminophosphonates: Antibacterial Effects and Oxidative Stress Modulation on Selected E. coli Strains
Source: MDPI journal article supplement (doi:10.3390/ijms24087609), 2023-04-20
Supplement: s1 [file s1]

## Supplementary materials

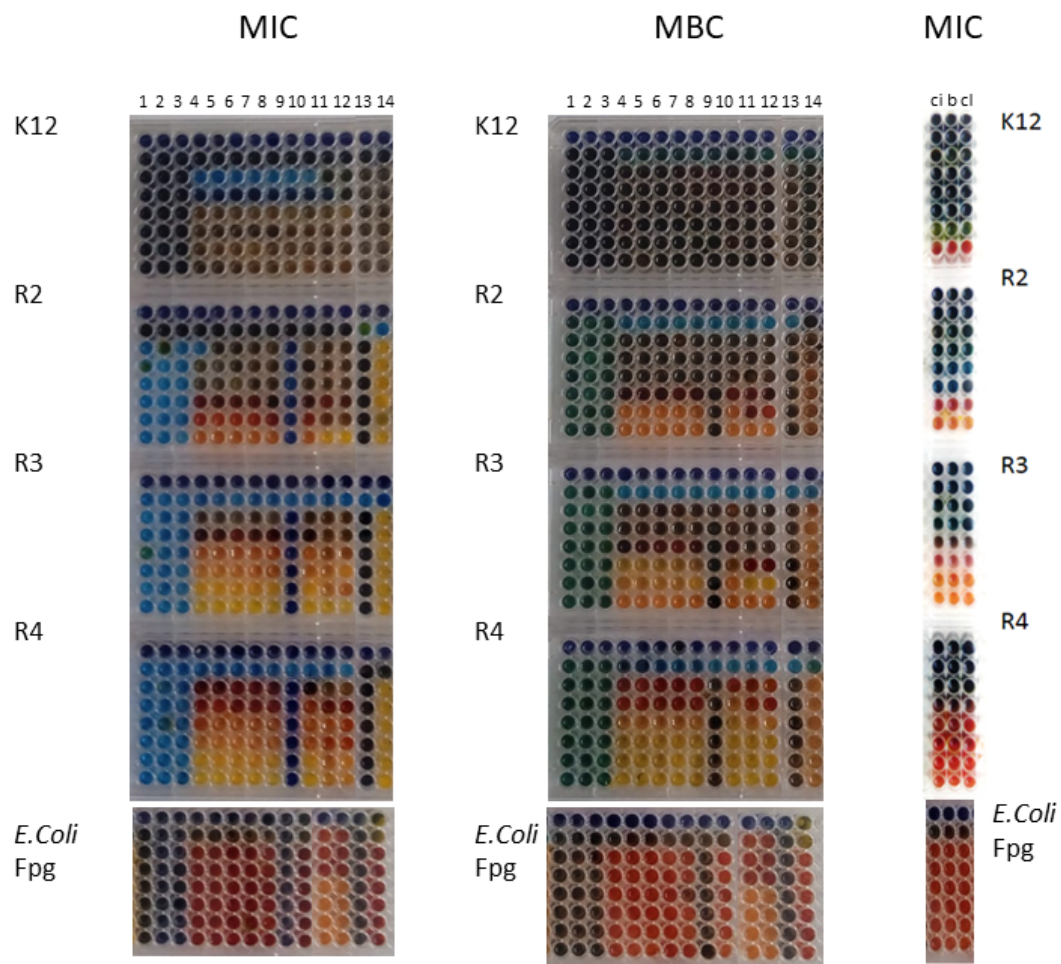

**Figure S1.** Examples of MIC and MBC on microplates with different concentration of studied compounds ( $\mu\text{g/mL}^{-1}$ ). Resazurin was added as an indicator of microbial growth with K12, R2, R3, R4 strains and *E. coli* Fpg with tested compounds, as described in Figure 4 and 5. Additionally, examples of MIC with different strains K12, R2, R3, R4 and *E. coli* Fpg of studied antibiotics with ciprofloxacin (ci), bleomycin (b), and cloxacillin (cl) in ( $\mu\text{g/mL}^{-1}$ ).

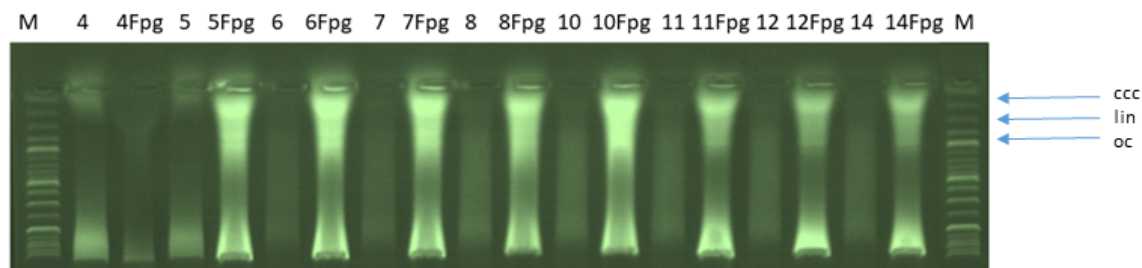

**Figure S2.** An example of an agarose gel electrophoresis separation of isolated plasmids DNA on R4 strains modified with selected coumarin derivatives and digested with repair Fpg protein. M = marker.

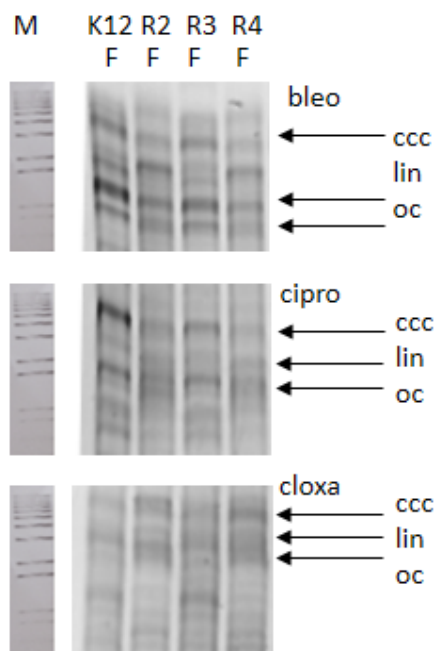

**Figure S3.** Example of an agarose gel electrophoresis separation of isolated plasmids DNA from K12 and R4 strains modified with antibiotics: bleomycin, ciprofloxacin, and cloxacillin digested (or not) with repair enzymes Fpg. M = marker.

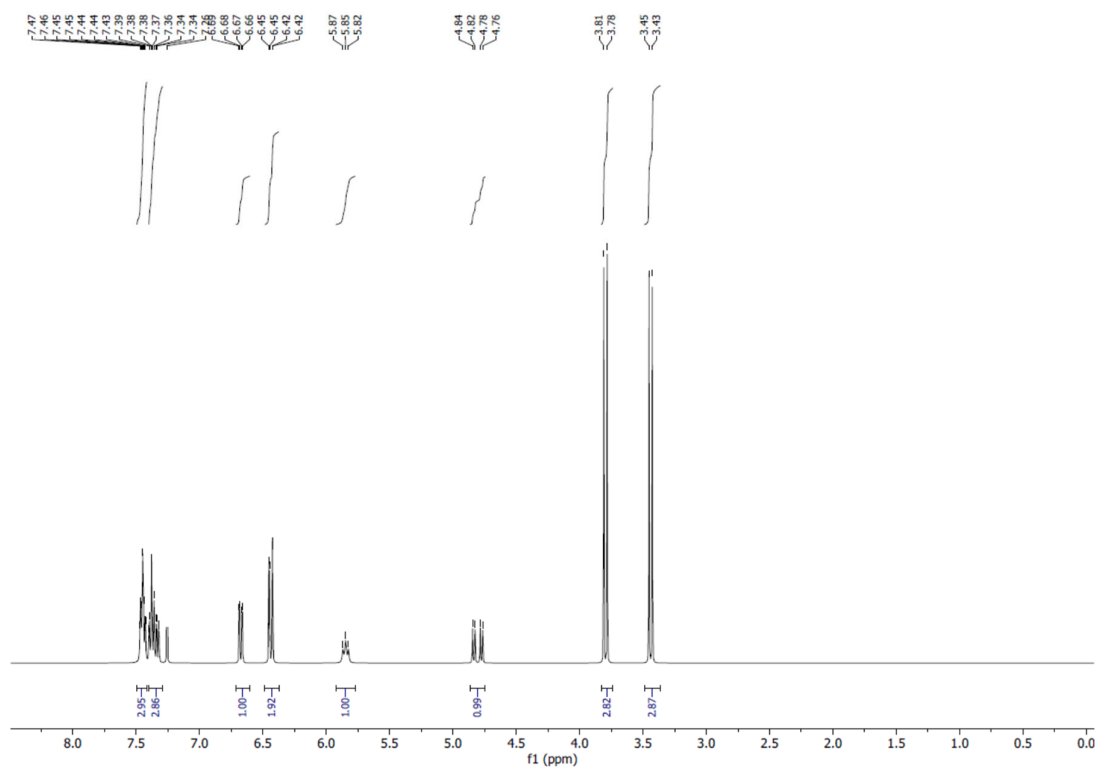

Figure S4. <sup>1</sup>H NMR (400 MHz, CDCl<sub>3</sub>) of (1).

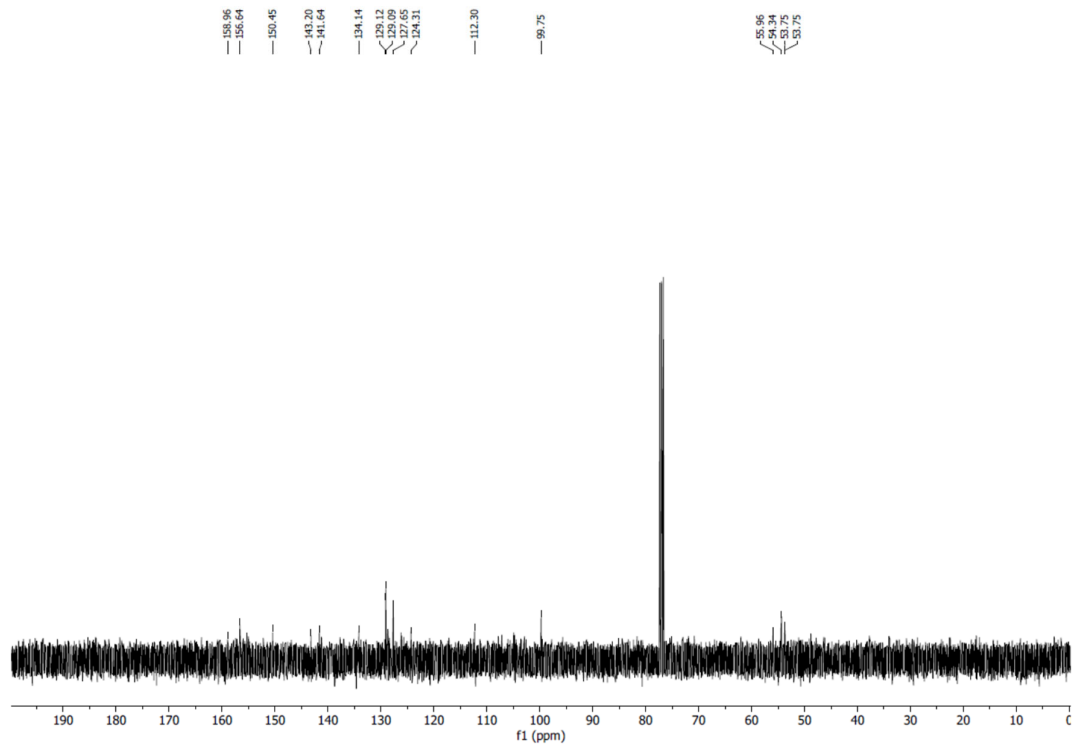

Figure S5. <sup>13</sup>C NMR (100 MHz, CDCl<sub>3</sub>) of (1).

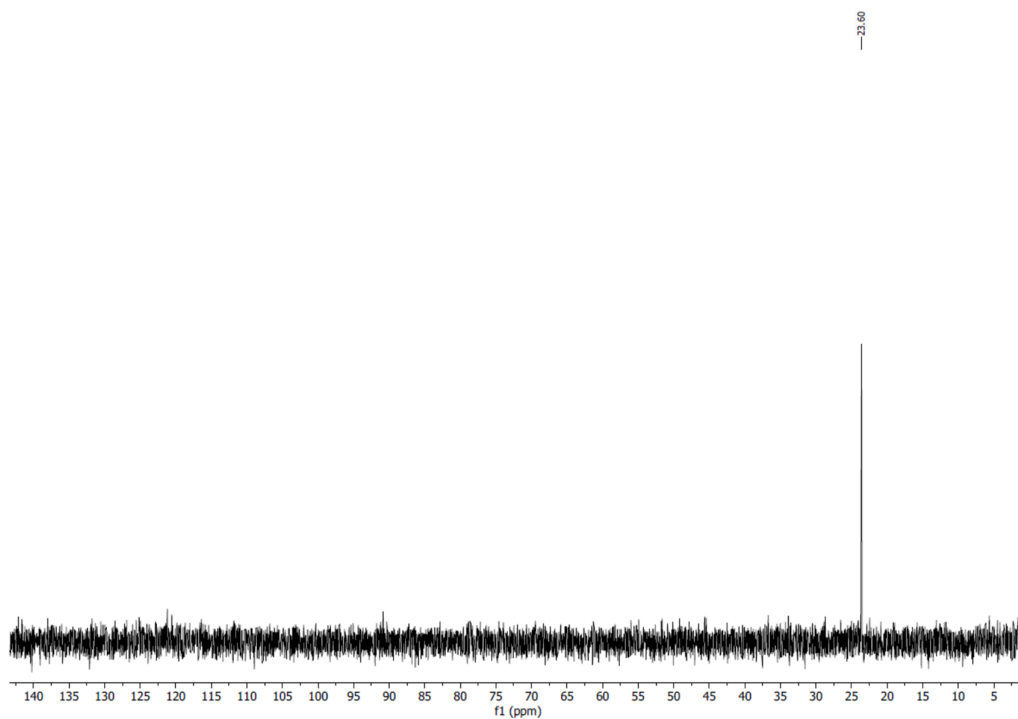

Figure S6. <sup>31</sup>P NMR (162 MHz, CDCl<sub>3</sub>) of (1).

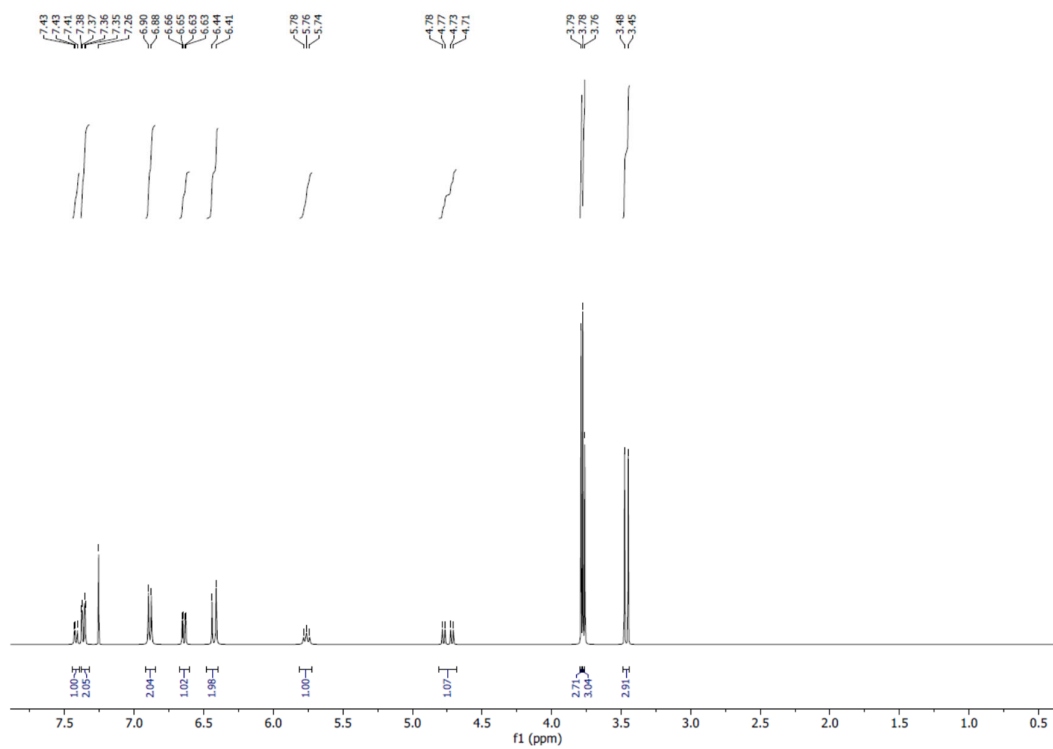

Figure S7. <sup>1</sup>H NMR (400 MHz, CDCl<sub>3</sub>) of (2).

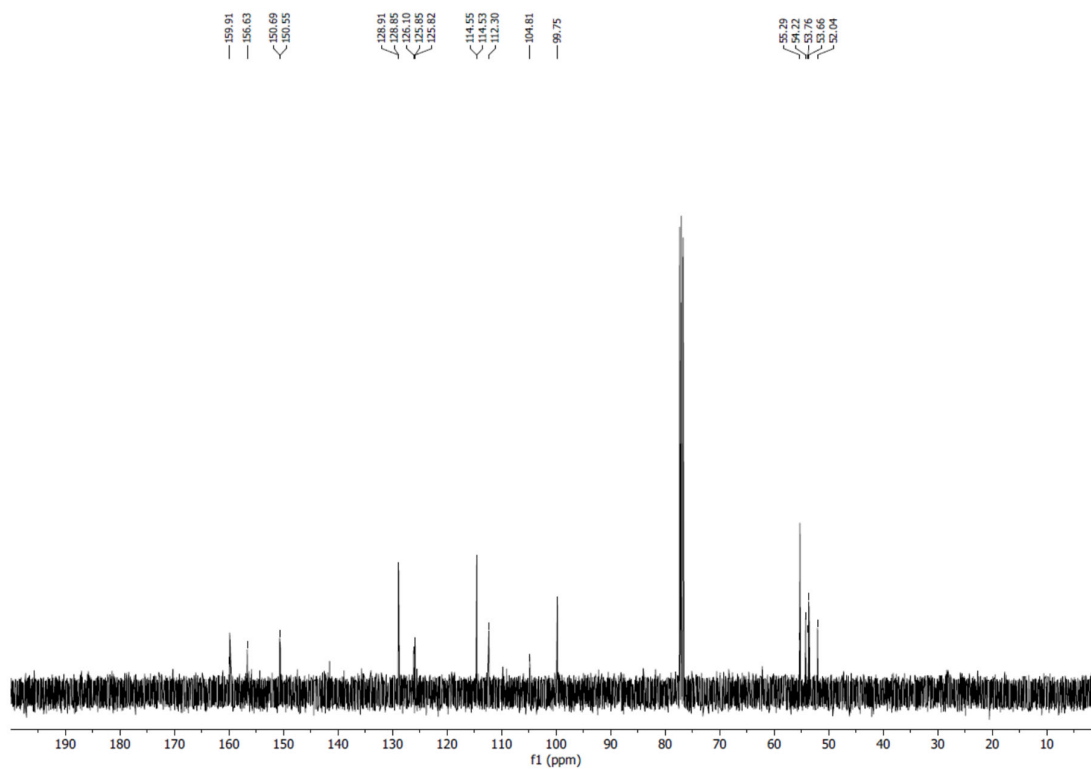

Figure S8.  $^{13}\text{C}$  NMR (100 MHz,  $\text{CDCl}_3$ ) of (2).

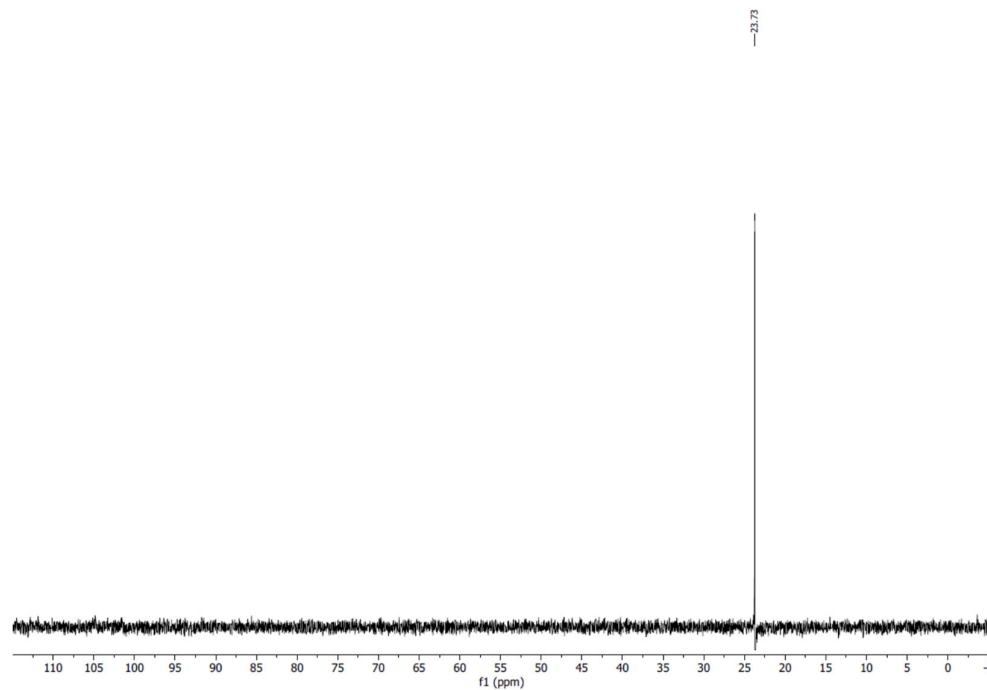

Figure S9.  $^{31}\text{P}$  NMR (162 MHz,  $\text{CDCl}_3$ ) of (2).

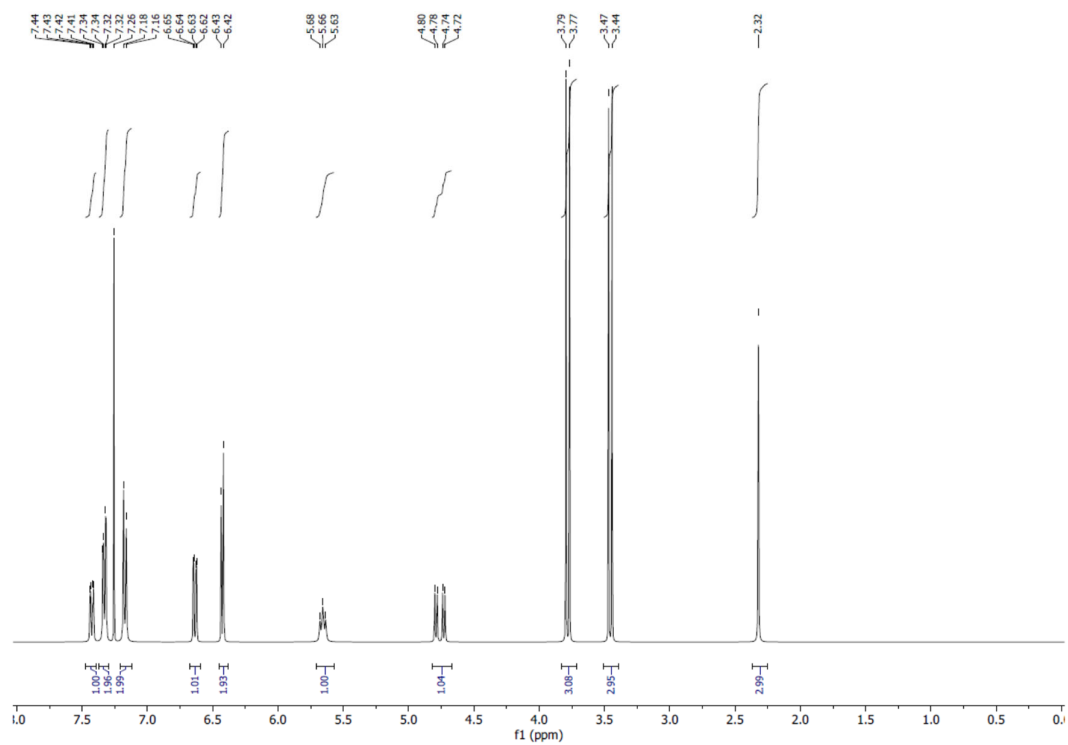

Figure S10.  $^1\text{H}$  NMR (400 MHz,  $\text{CDCl}_3$ ) of (3).

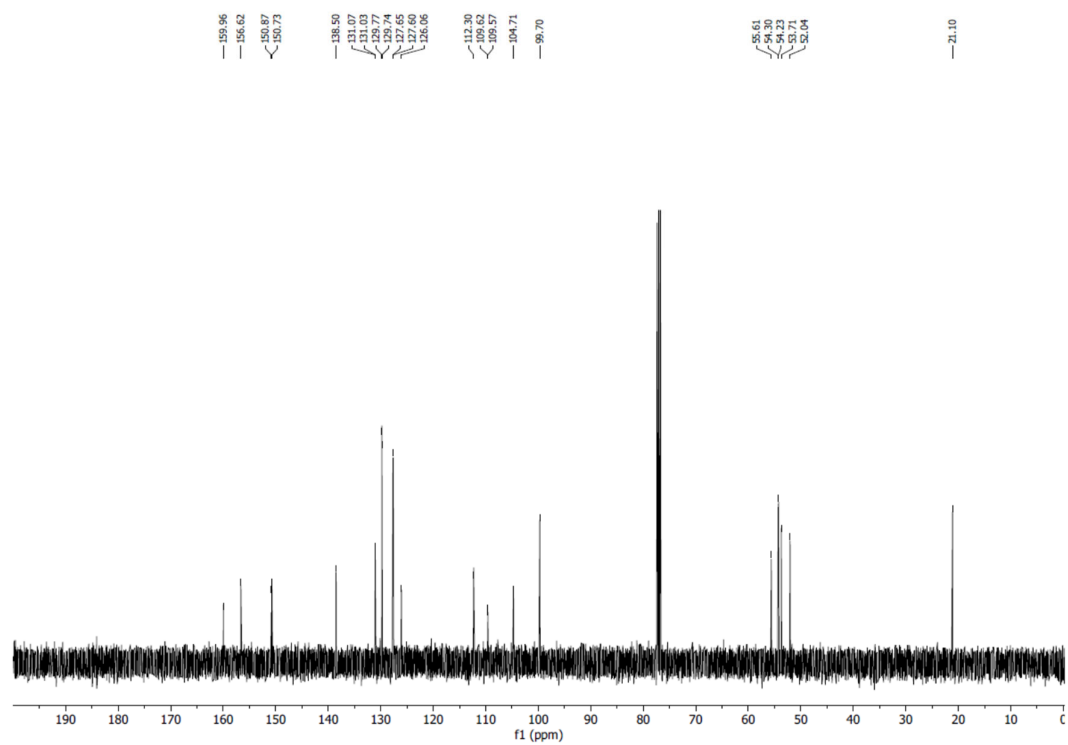

Figure S11.  $^{13}\text{C}$  NMR (100 MHz,  $\text{CDCl}_3$ ) of (3).

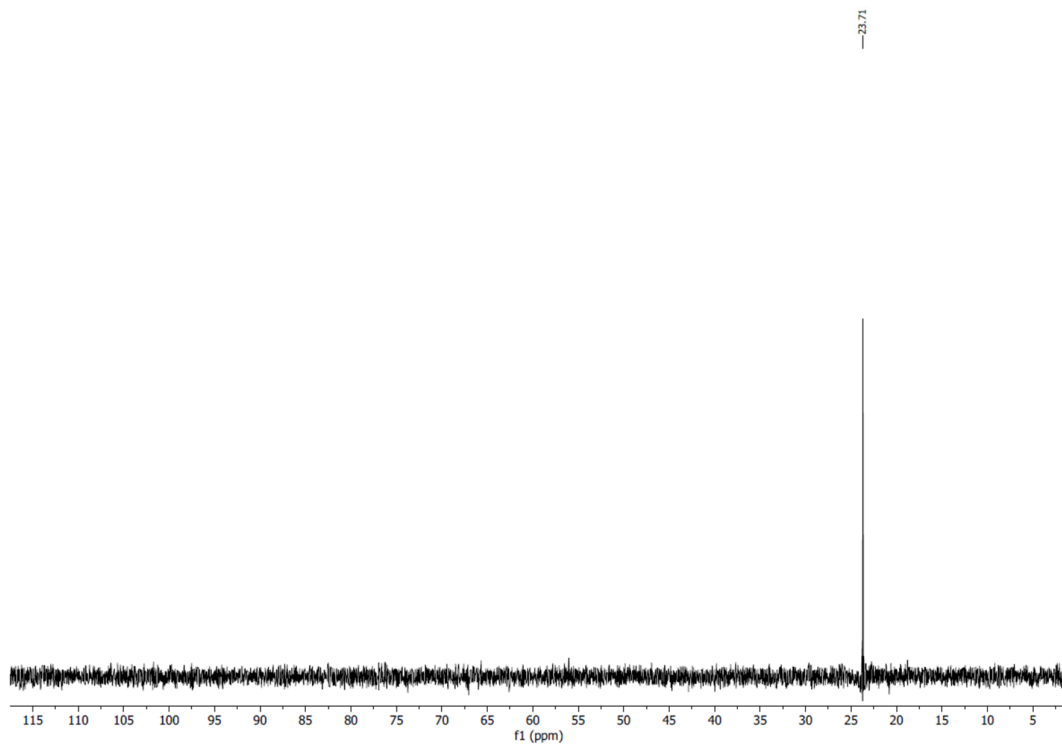

Figure S12. <sup>31</sup>P NMR (162 MHz, CDCl<sub>3</sub>) of (3).

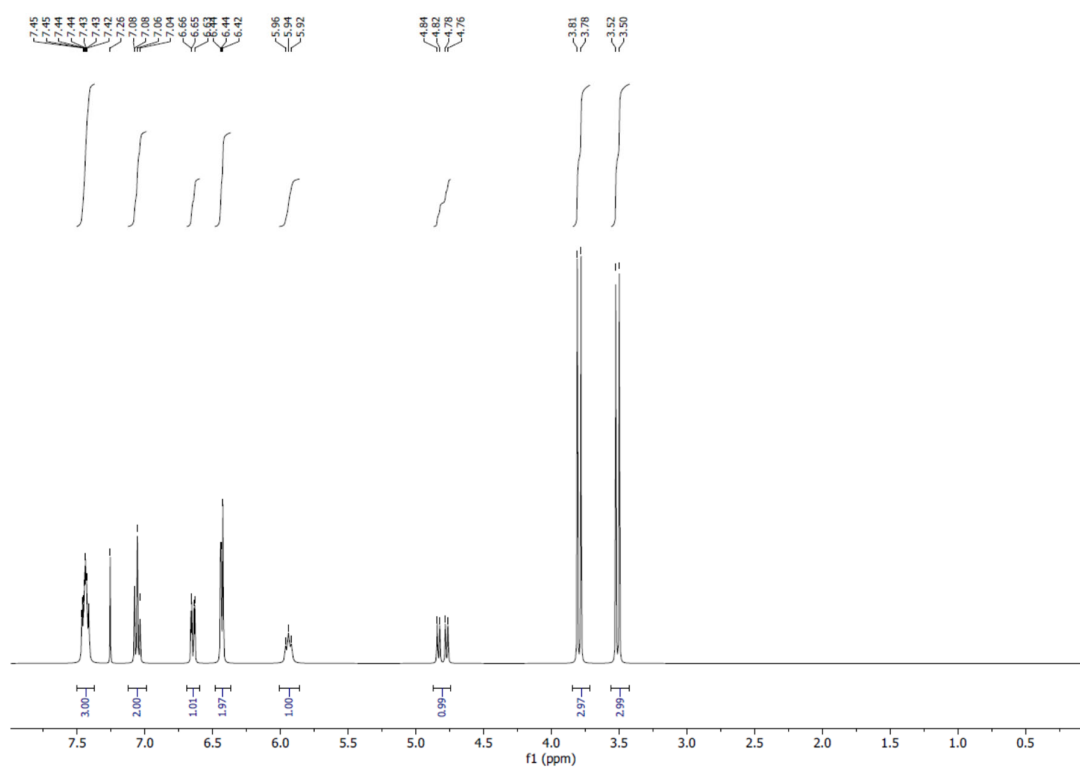

Figure S13. <sup>1</sup>H NMR (400 MHz, CDCl<sub>3</sub>) of (4).

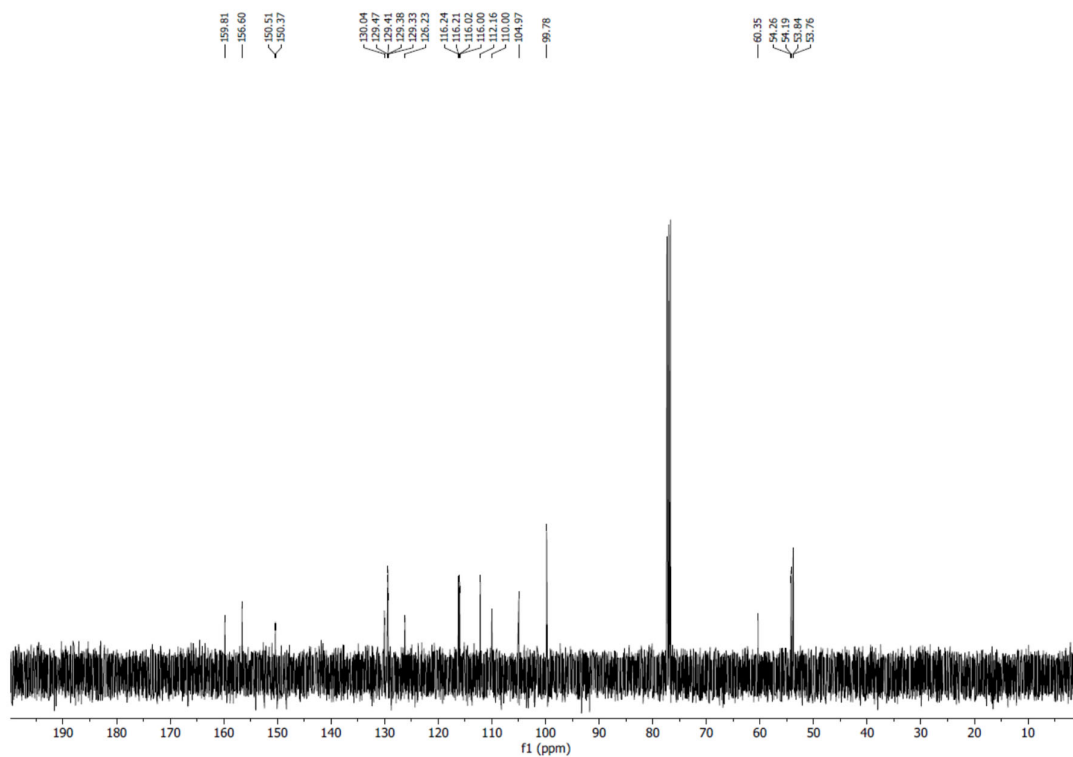

Figure S14.  $^{13}\text{C}$  NMR (100 MHz,  $\text{CDCl}_3$ ) of (4).

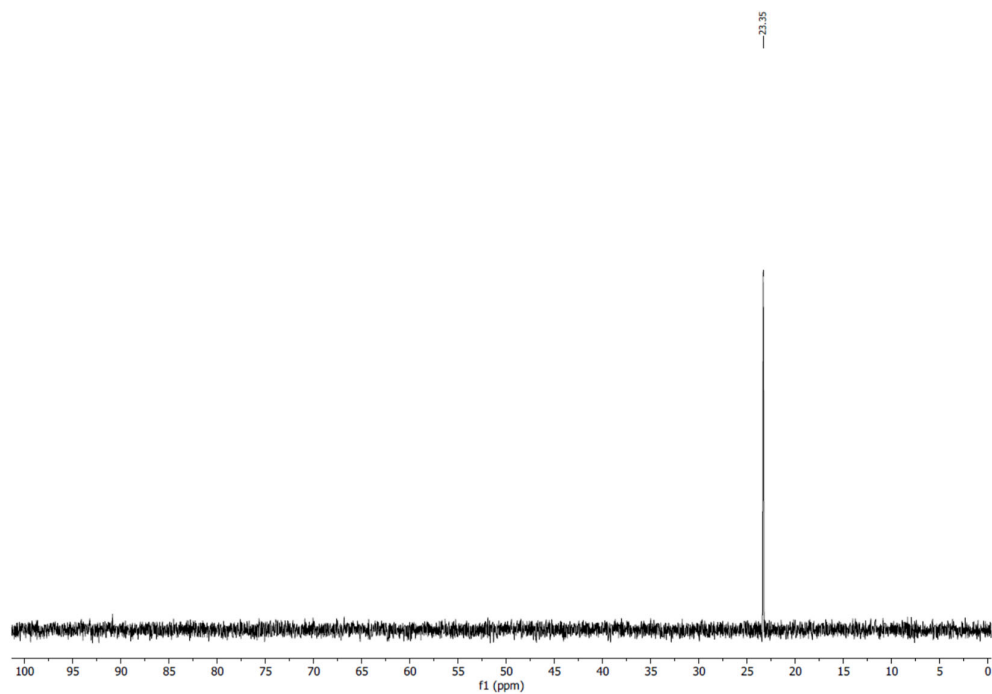

Figure S15.  $^{31}\text{P}$  NMR (162 MHz,  $\text{CDCl}_3$ ) of (4).



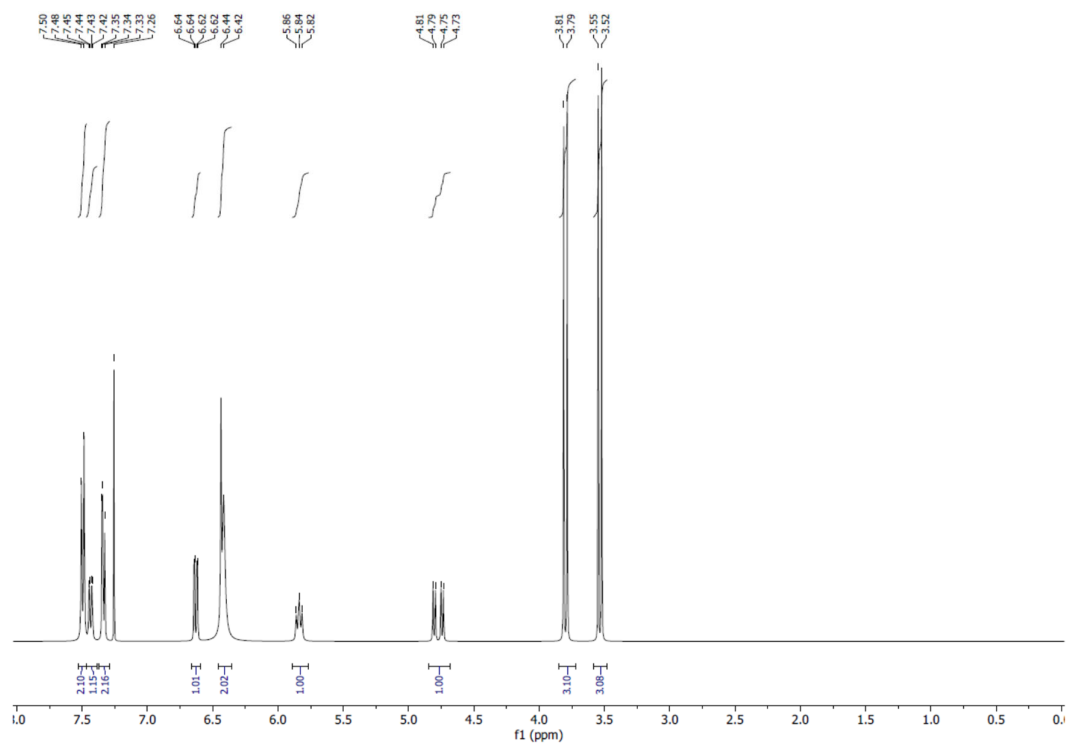

Figure S16. <sup>1</sup>H NMR (400 MHz, CDCl<sub>3</sub>) of (5).

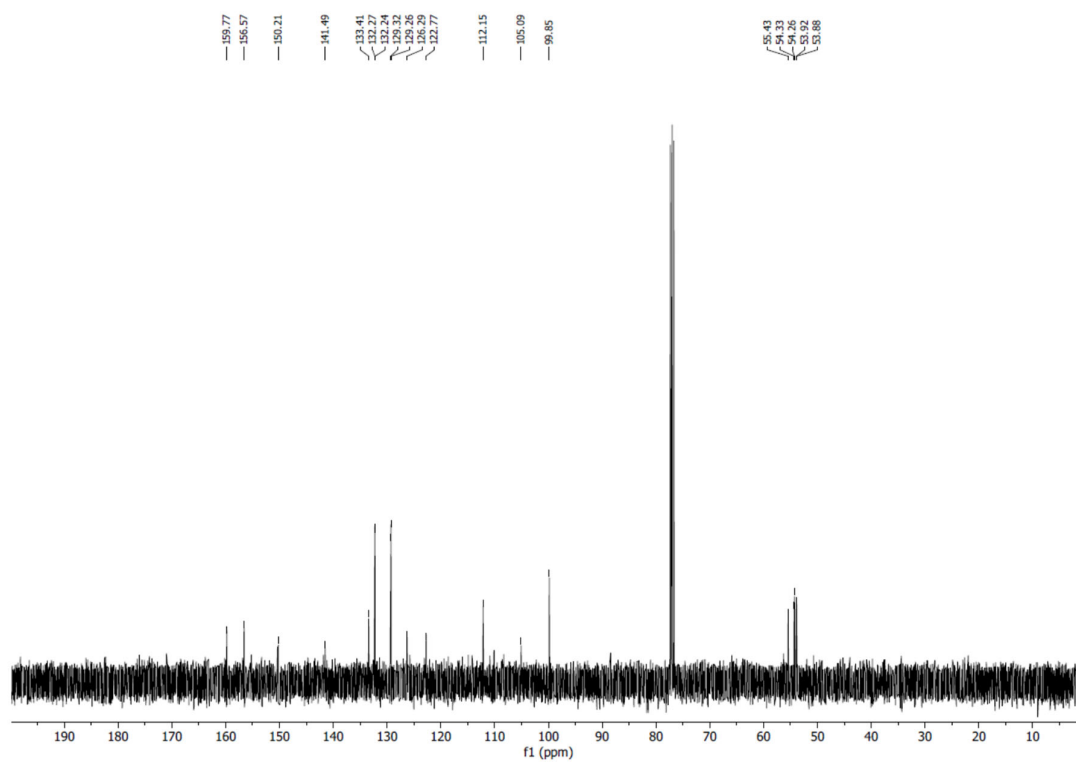

Figure S17. <sup>13</sup>C NMR (100 MHz, CDCl<sub>3</sub>) of (5).

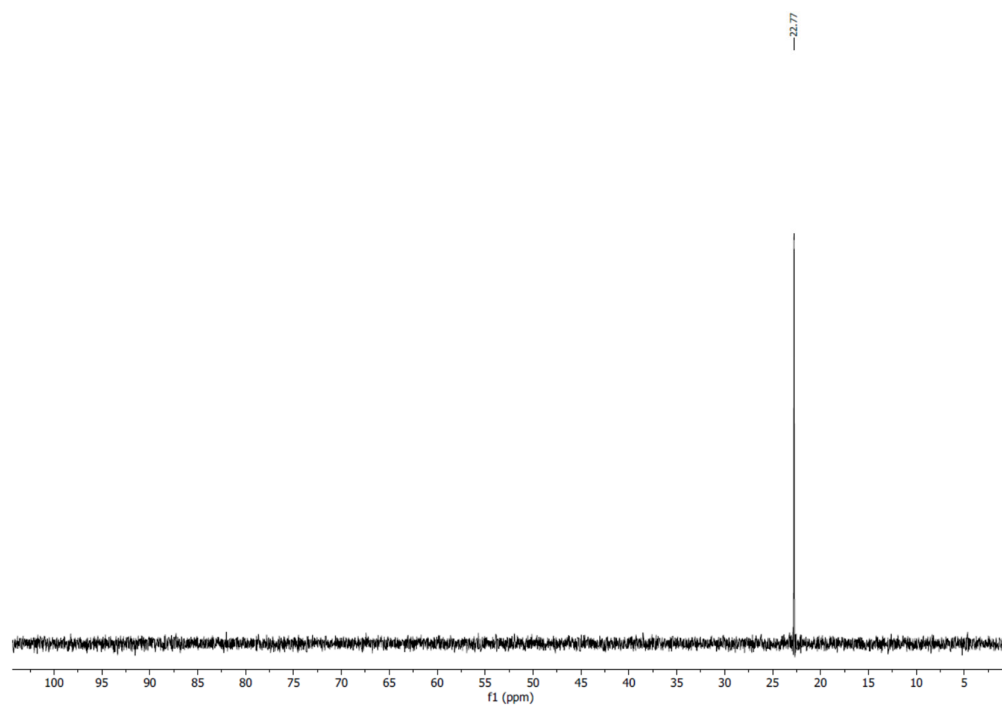

Figure S18. <sup>31</sup>P NMR (162 MHz, CDCl<sub>3</sub>) of (5).

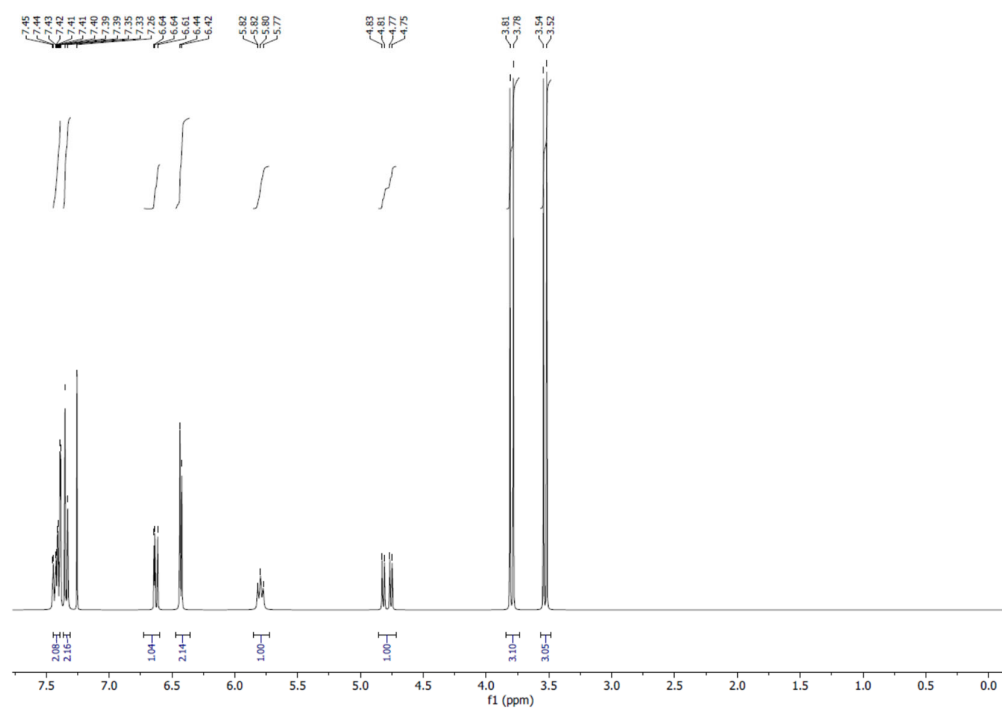

Figure S19. <sup>1</sup>H NMR (400 MHz, CDCl<sub>3</sub>) of (6).

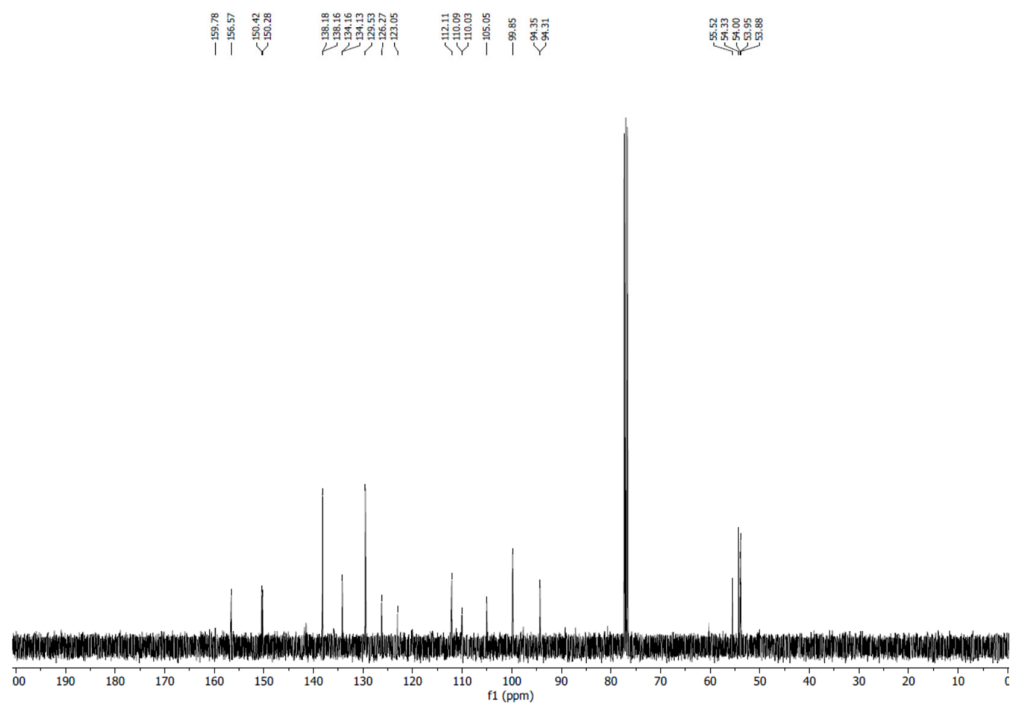

Figure S20.  $^{13}\text{C}$  NMR (100 MHz,  $\text{CDCl}_3$ ) of (6).

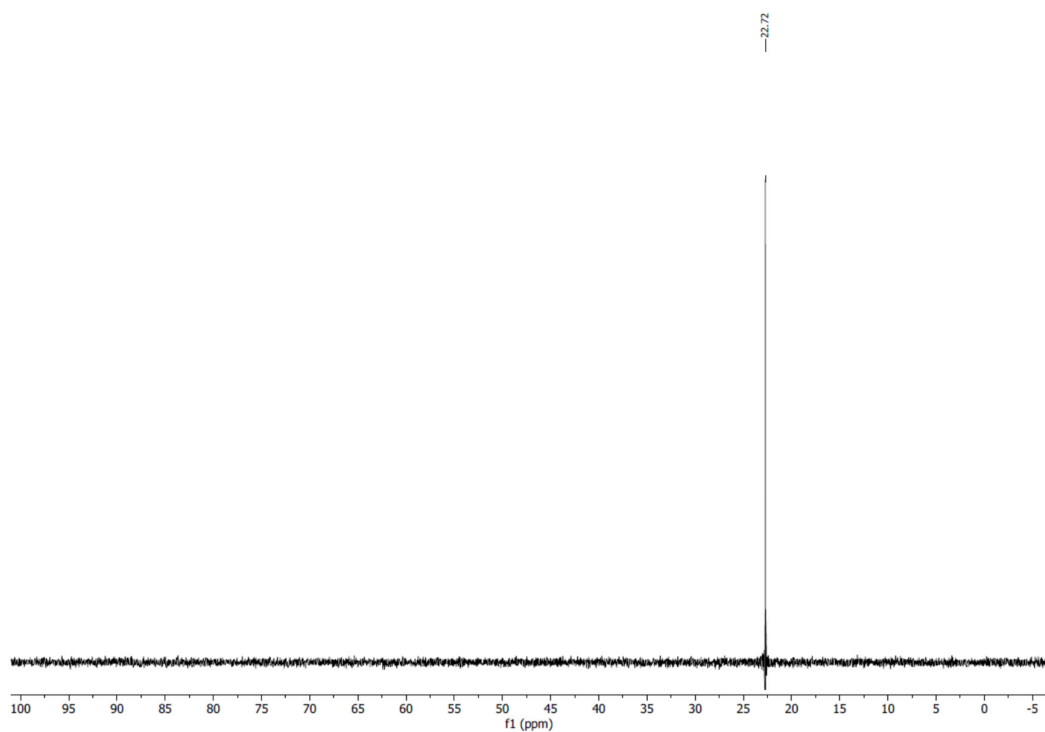

Figure S21.  $^{31}\text{P}$  NMR (162 MHz,  $\text{CDCl}_3$ ) of (6).

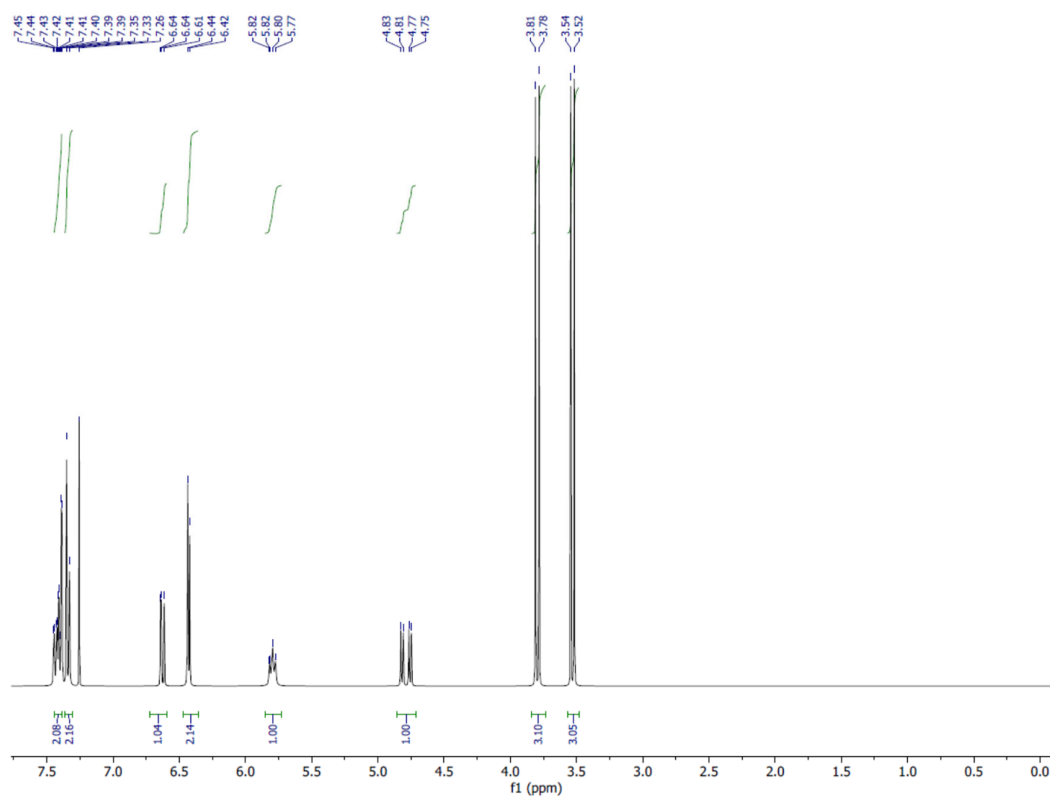

Figure S22.  $^1\text{H}$  NMR (400 MHz,  $\text{CDCl}_3$ ) of (7).

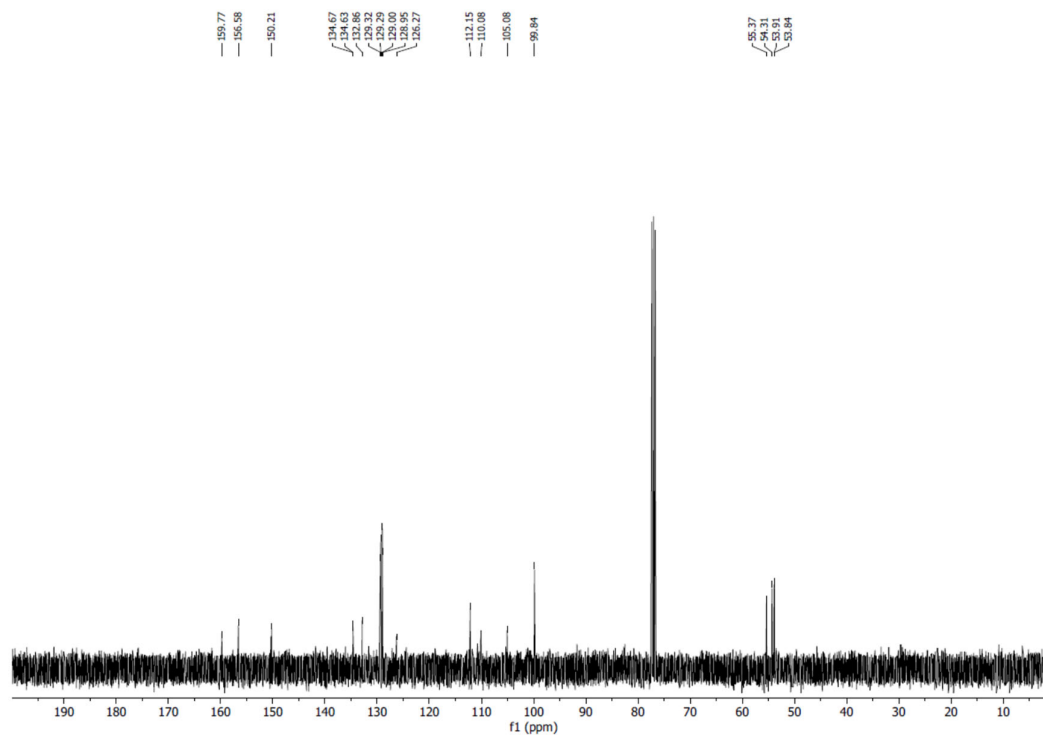

Figure S23.  $^{13}\text{C}$  NMR (100 MHz,  $\text{CDCl}_3$ ) of (7).

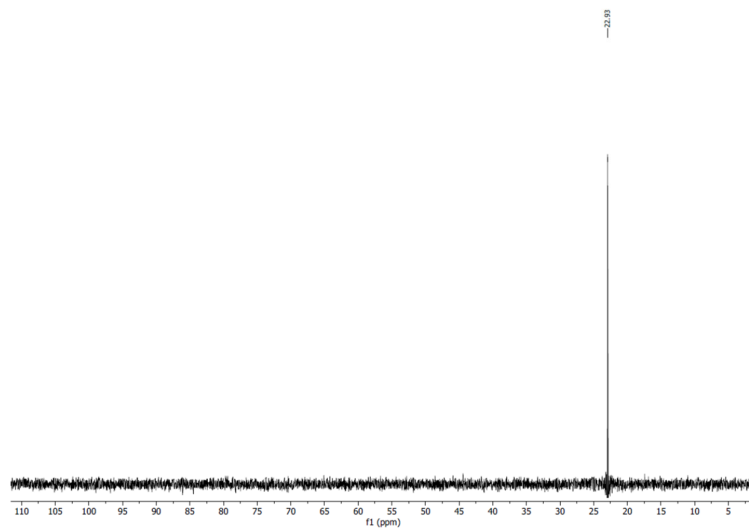

**Figure S24.**  $^{31}\text{P}$  NMR (162 MHz,  $\text{CDCl}_3$ ) of (7).

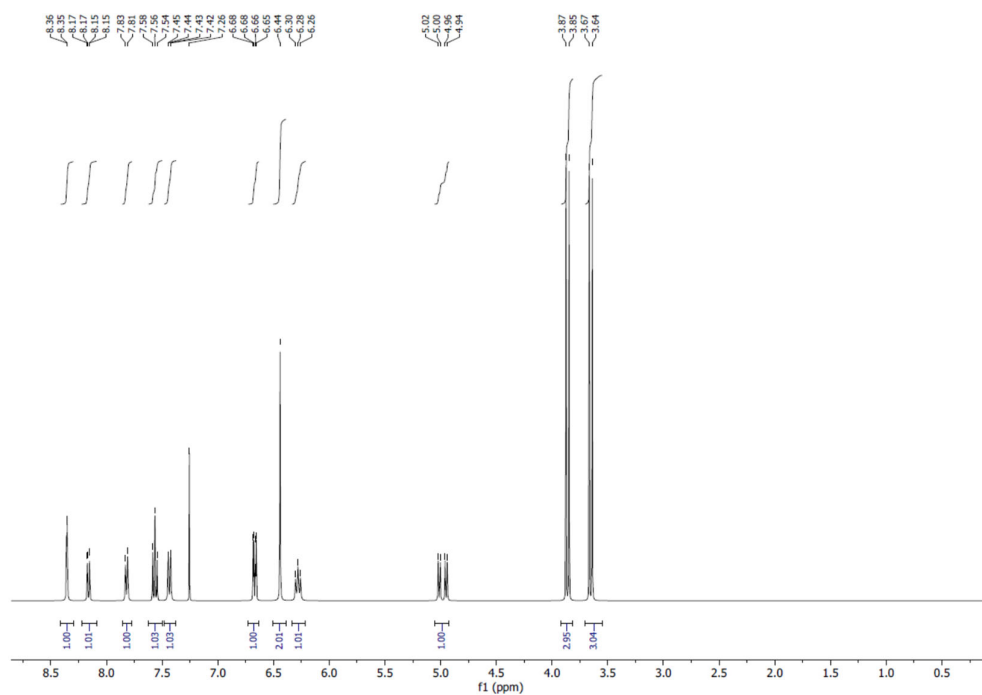

**Figure S25.**  $^1\text{H}$  NMR (400 MHz,  $\text{CDCl}_3$ ) of (8).

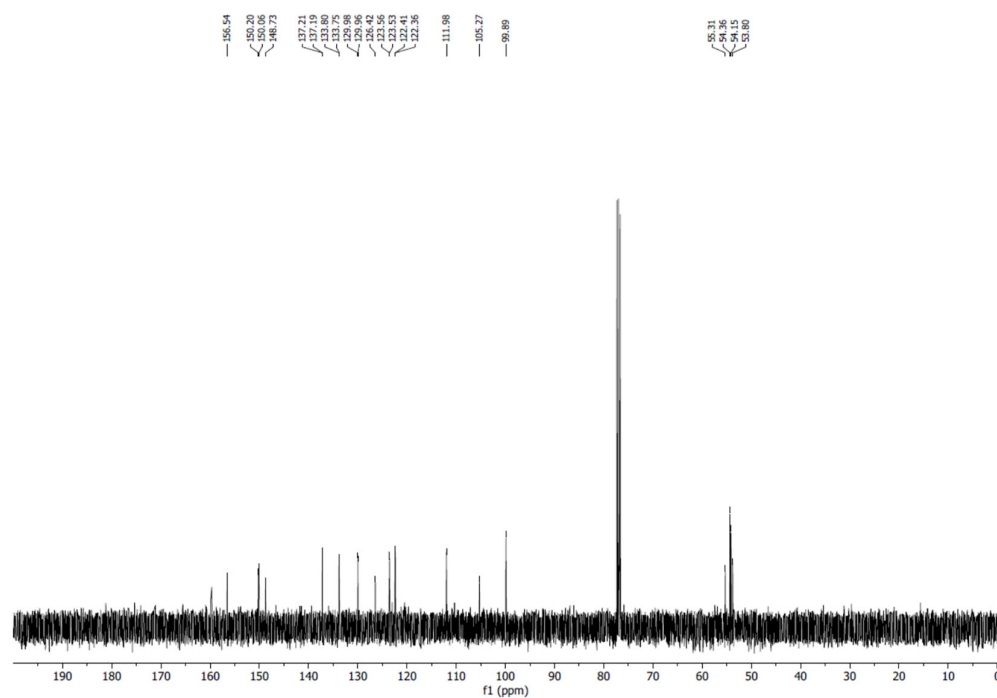

Figure S26.  $^{13}\text{C}$  NMR (100 MHz,  $\text{CDCl}_3$ ) of (8).

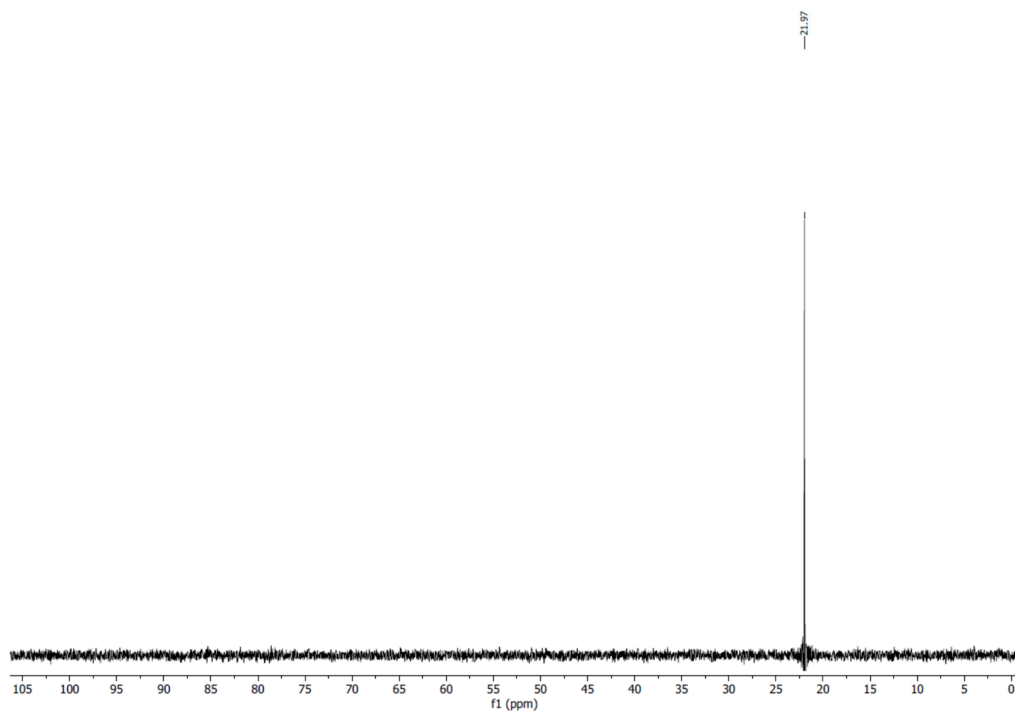

Figure S27.  $^{31}\text{P}$  NMR (162 MHz,  $\text{CDCl}_3$ ) of (8).

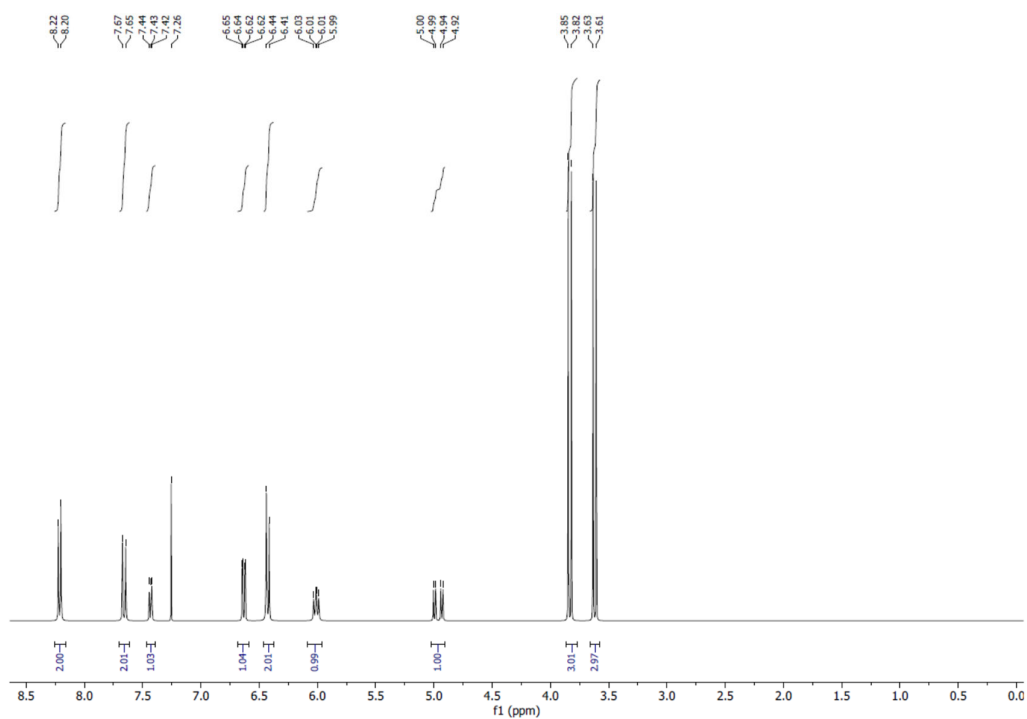

Figure S28. <sup>1</sup>H NMR (400 MHz, CDCl<sub>3</sub>) of (9).

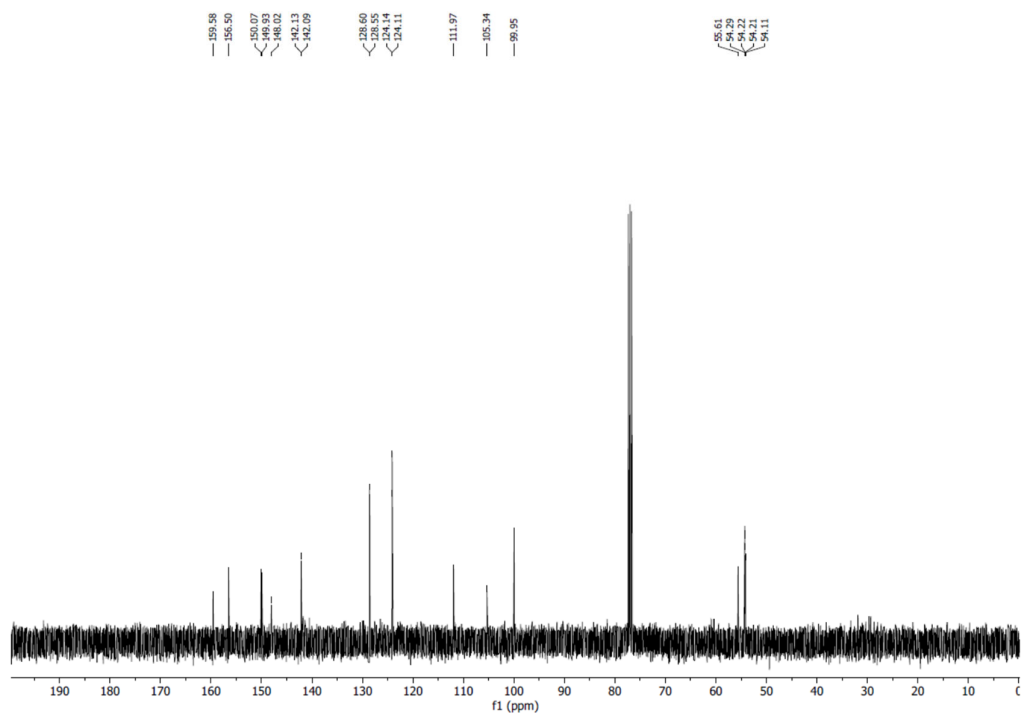

Figure S29. <sup>13</sup>C NMR (100 MHz, CDCl<sub>3</sub>) of (9).

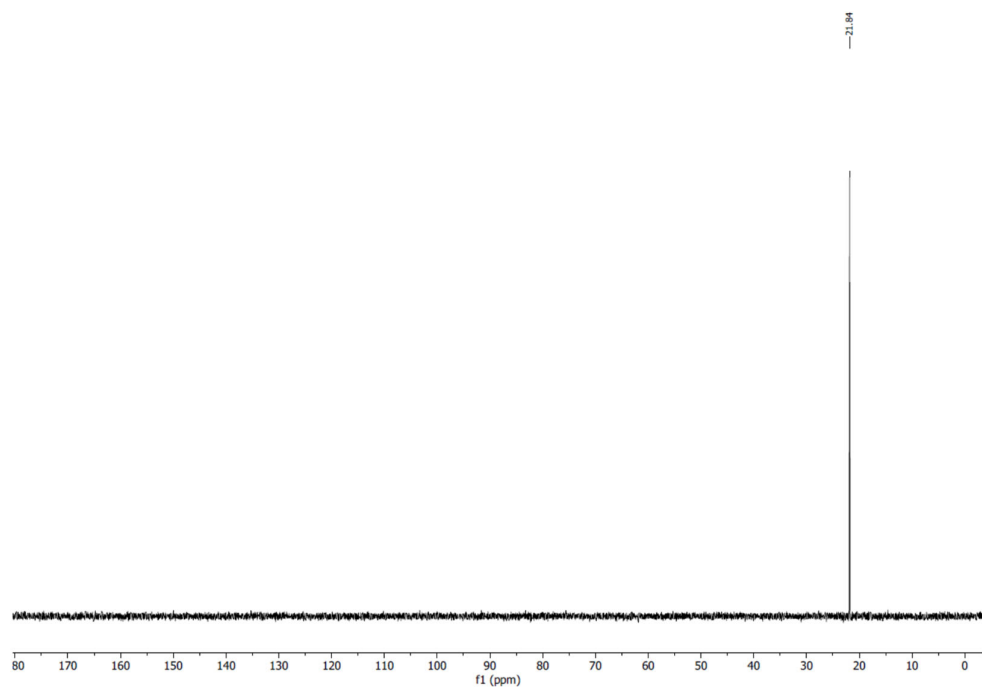

Figure S30. <sup>31</sup>P NMR (162 MHz, CDCl<sub>3</sub>) of (9).

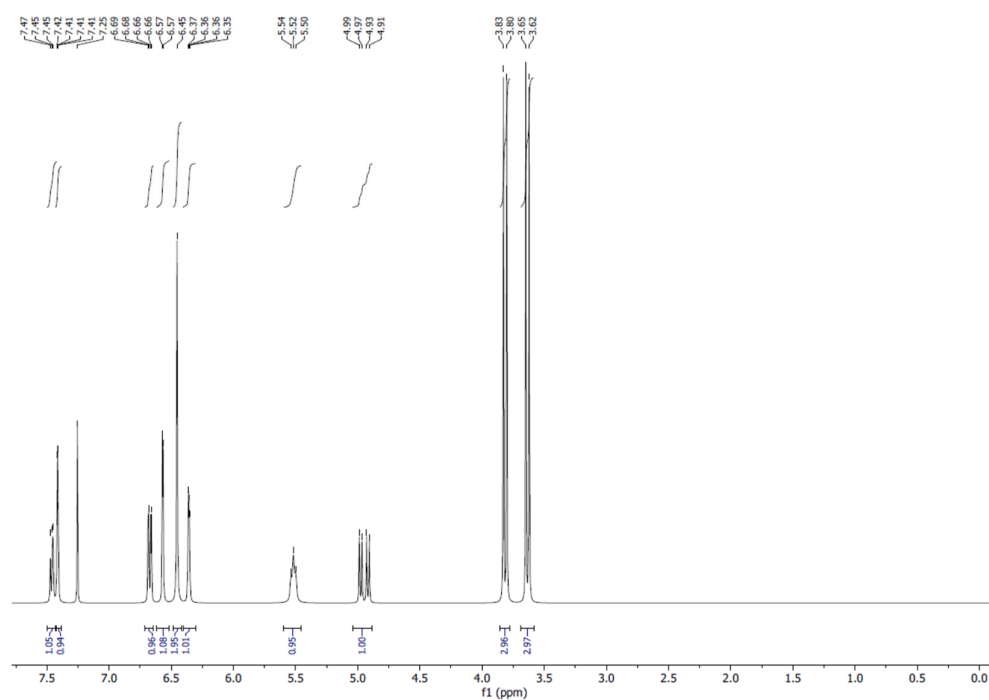

Figure S31. <sup>1</sup>H NMR (400 MHz, CDCl<sub>3</sub>) of (10).



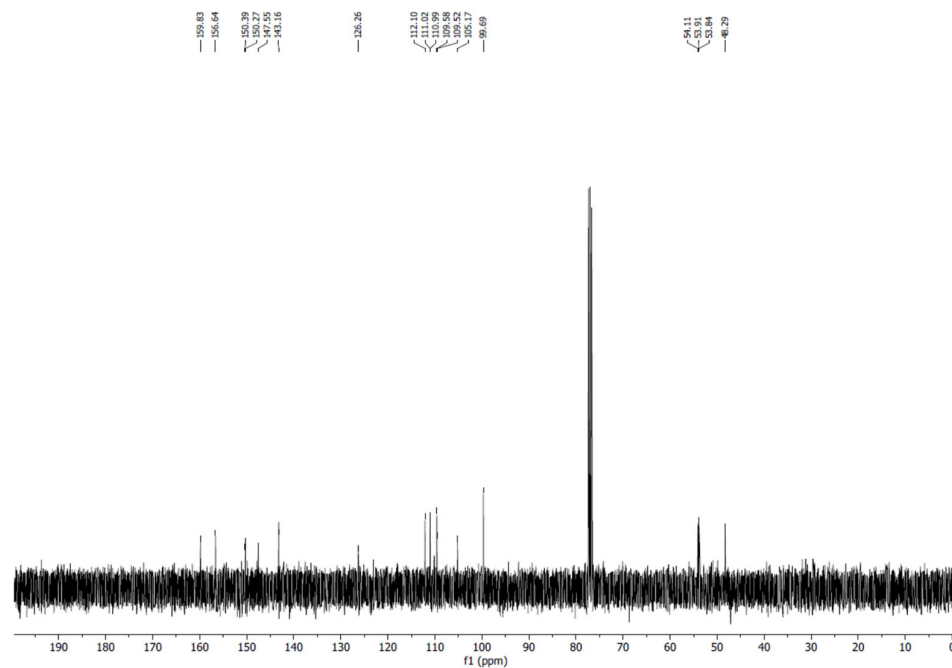

Figure S32.  $^{13}\text{C}$  NMR (100 MHz,  $\text{CDCl}_3$ ) of (10).

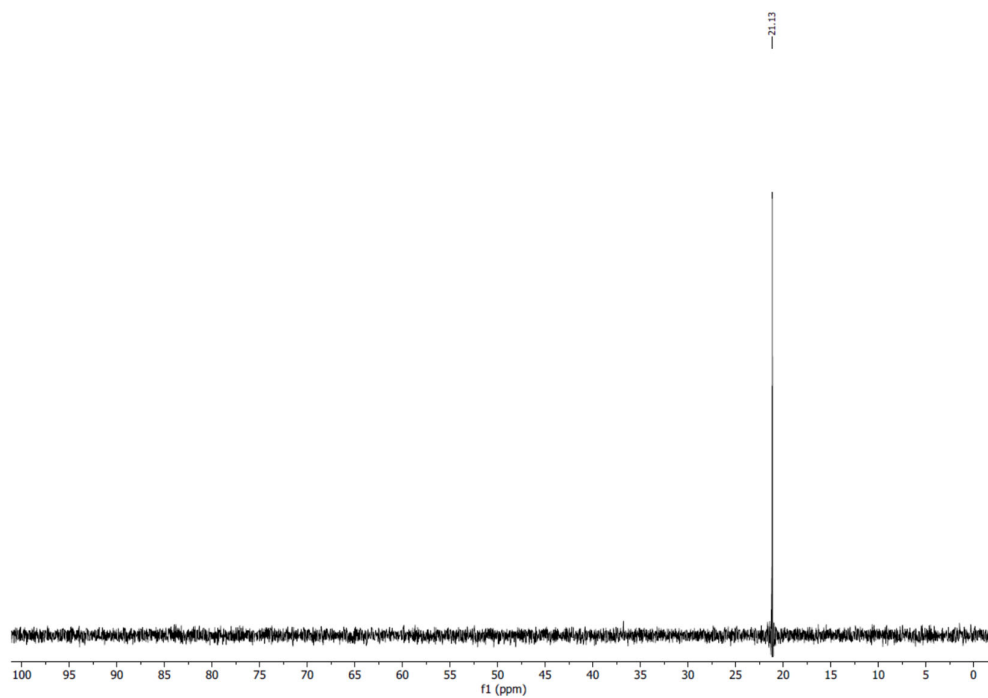

Figure S33.  $^{31}\text{P}$  NMR (162 MHz,  $\text{CDCl}_3$ ) of (10).

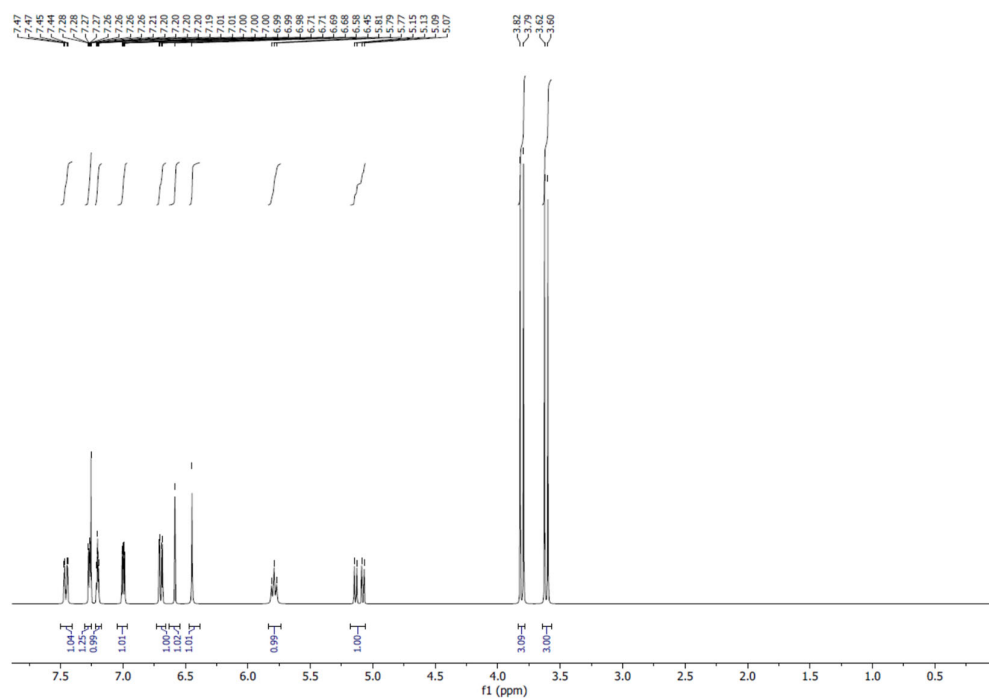

Figure S34. <sup>1</sup>H NMR (400 MHz, CDCl<sub>3</sub>) of (11).

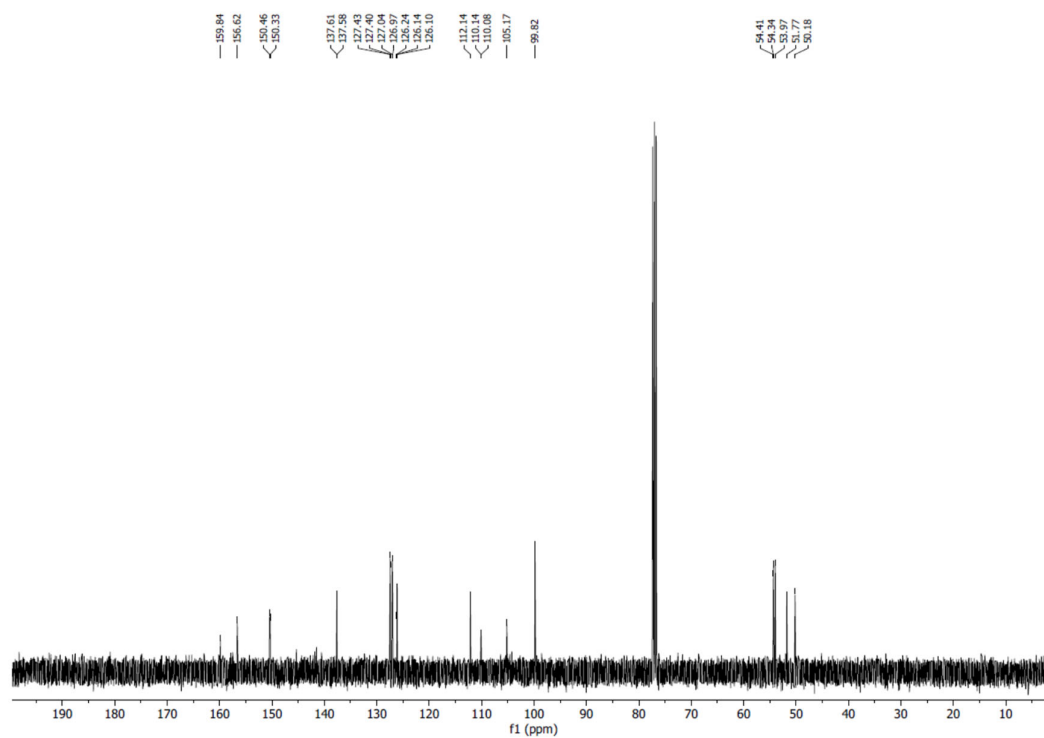

Figure S35. <sup>13</sup>C NMR (100 MHz, CDCl<sub>3</sub>) of (11).

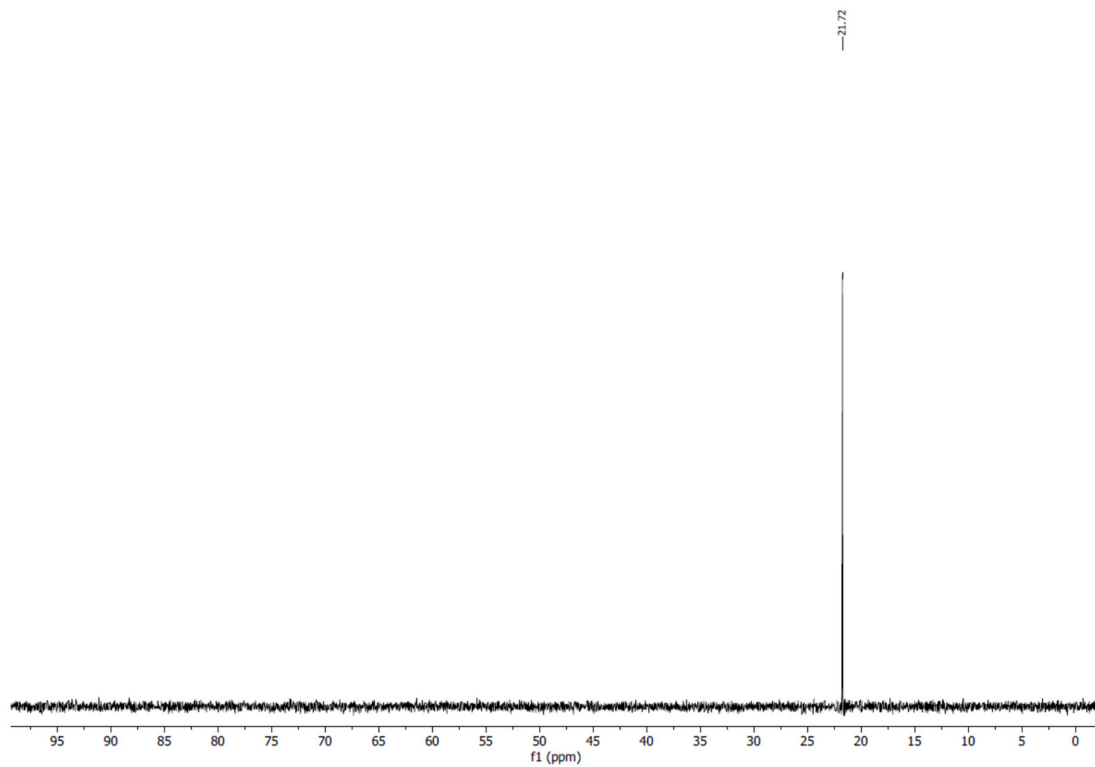

Figure S36. <sup>31</sup>P NMR (162 MHz, CDCl<sub>3</sub>) of (11).

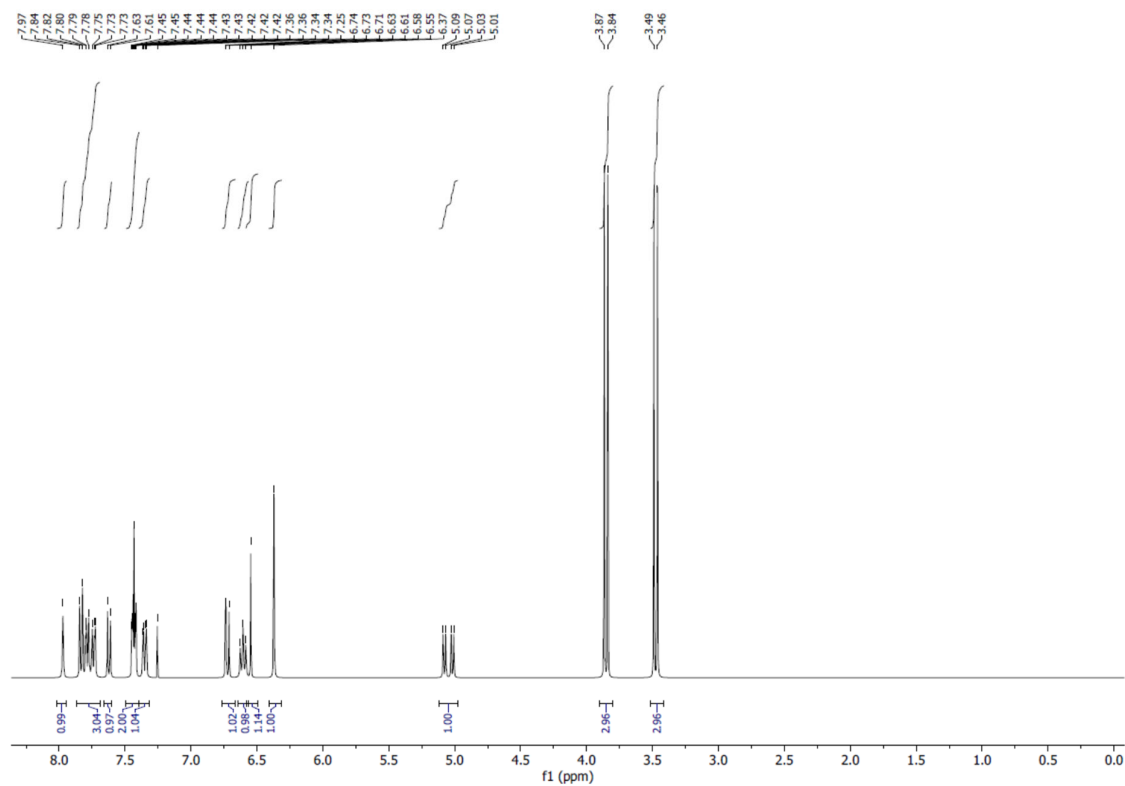

Figure S37. <sup>1</sup>H NMR (400 MHz, CDCl<sub>3</sub>) of (12).

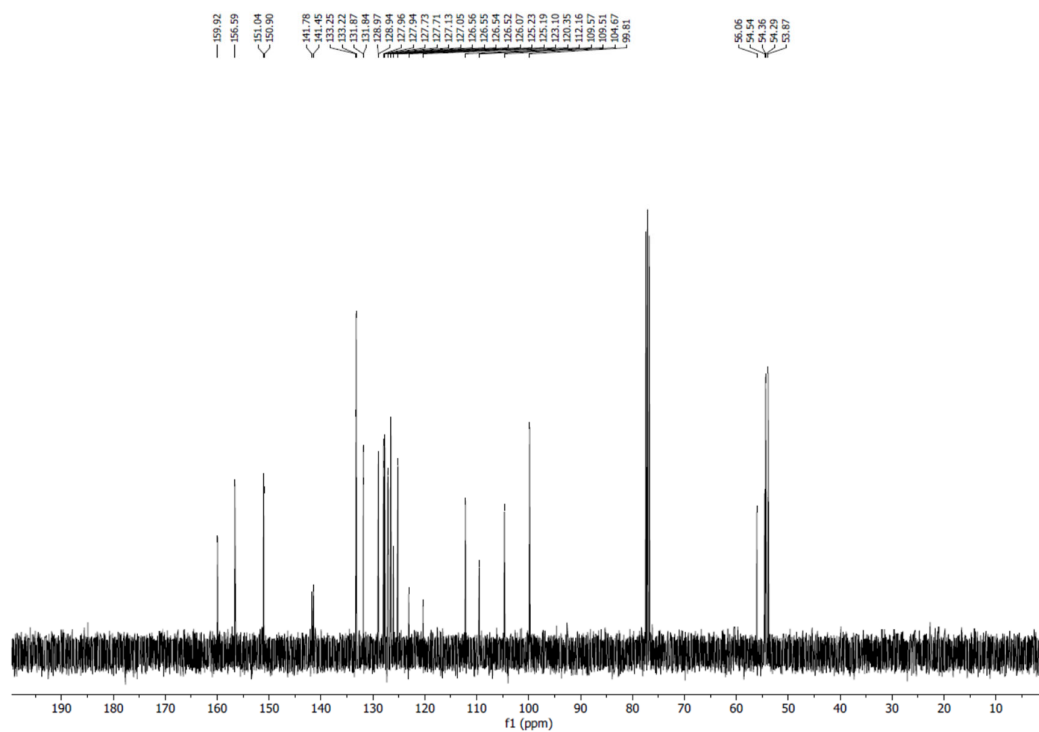

Figure S38.  $^{13}\text{C}$  NMR (100 MHz,  $\text{CDCl}_3$ ) of (12).

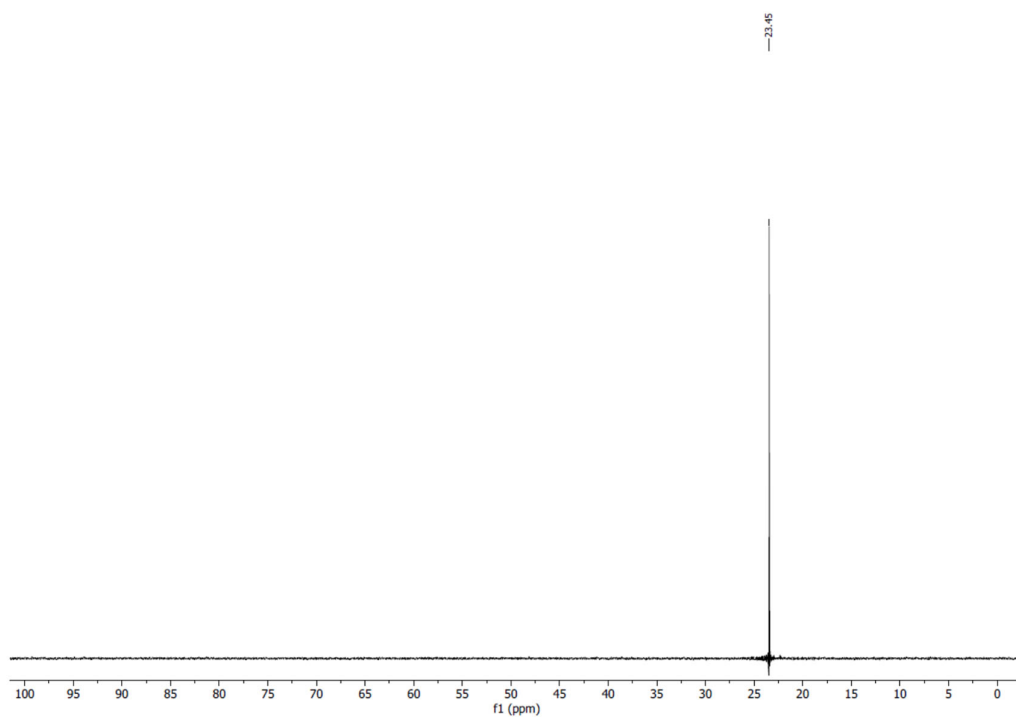

Figure S39.  $^{31}\text{P}$  NMR (162 MHz,  $\text{CDCl}_3$ ) of (12).

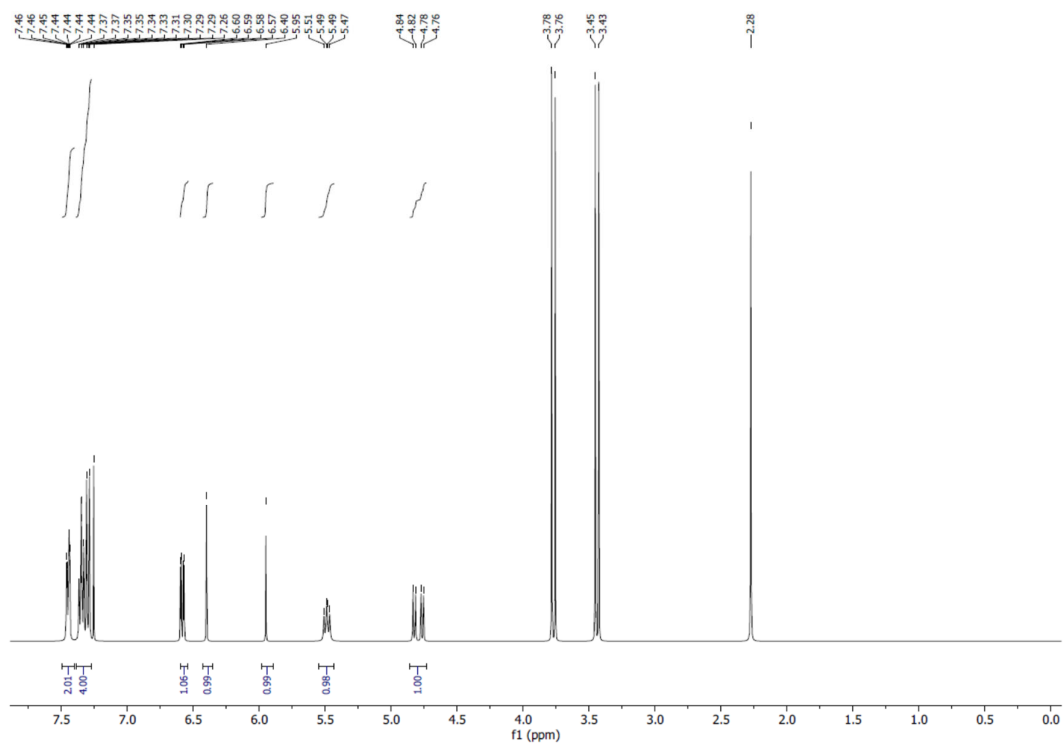

Figure S40. <sup>1</sup>H NMR (400 MHz, CDCl<sub>3</sub>) of (13).

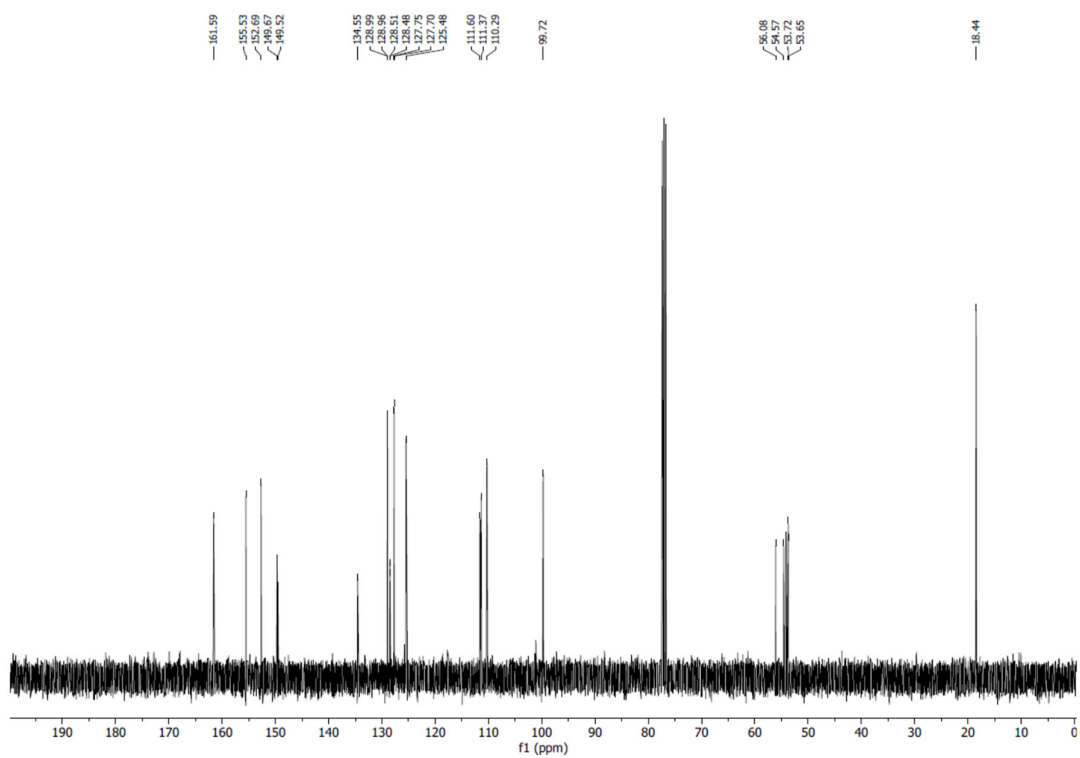

Figure S41. <sup>13</sup>C NMR (100 MHz, CDCl<sub>3</sub>) of (13).

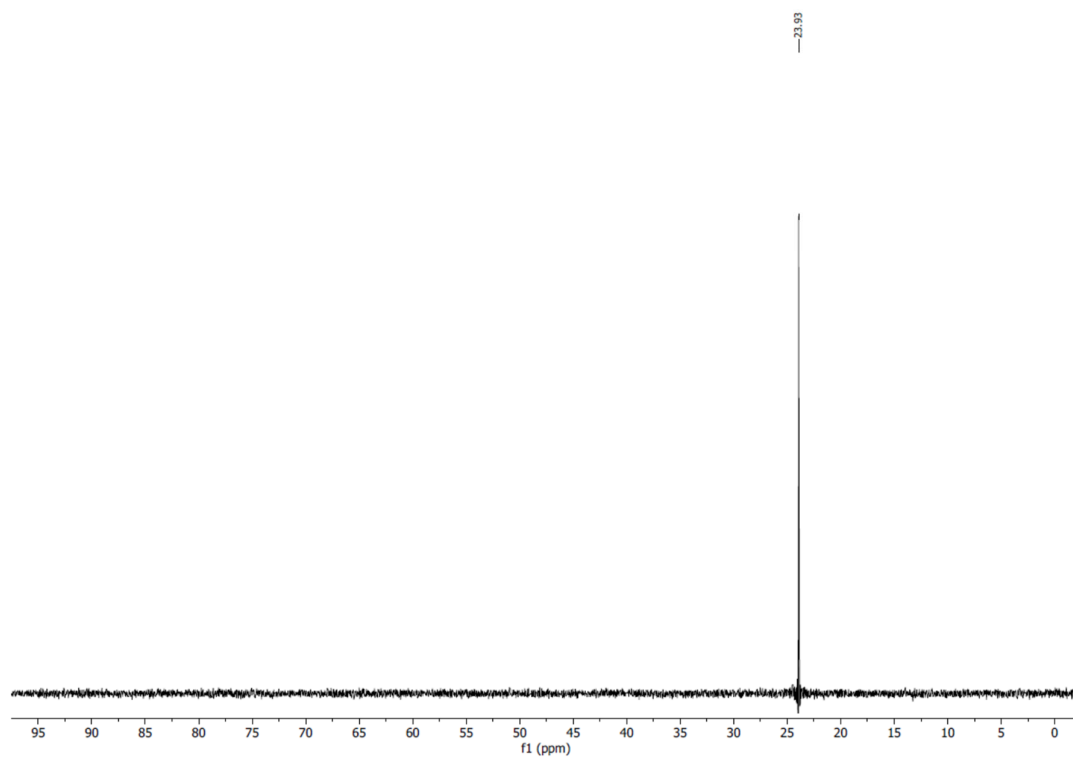

Figure S42.  $^{31}\text{P}$  NMR (162 MHz,  $\text{CDCl}_3$ ) of (**13**).

1.
